# Supplementary material for: Morphometry of the Wheat Spike by Analyzing 2D Images
Source: Preprints.org preprint supplement (doi:10.20944/preprints201903.0091.v1), 2019-03-07
Supplement: Supplementary file 1 [file supplementary]

**Supplementary materials for**

Recognition of the Wheat Spike in 2D Images

1. Algorithm for Color Scale Identification

- 1. Identifying Color Scale

The ColorChecker scale is identified by comparing it in a calibratable image (spike image) to a reference image. Initially, key points are found in the calibrated image using ORB algorithm (Oriented FAST and Rotated BRIEF, Feature2D::detect method; see the manual to OpenCV library, https://opencv.org, [1]). The key points are transformed to a form invariant relative to scaling and rotation, i.e., descriptors (Feature2D::extract). Each descriptor is a numerical vector.

Then, two descriptors of the calibrated image closest in the Hamming distance ( and ) are selected for each descriptor of the reference image () using DescriptorMatcher::knnMatch method. The pairs of (, ) type that meet the below condition are selected from the obtained pairs:

The following projective transformation between the key points is constructed according to the obtained pairs of descriptors with the help of RANSAC algorithm implemented Calib3d.findHomography:

The transformation is applied to the known angles of the reference image; this gives the angles of the region that contained the color scale on the calibrated image (Core.perspectiveTransform). The region is cut off from the image and is rotated so to match the reference image.

The scale of image (pixel size in mm) is computed from the ratio of the known color scale area and its area in the image (taking into account the correction for orientation).

1.2. Correcting Colors

The image color was calibrated with the color correction method used in epiluminescence [2].

Nine points are selected in each square of the palette in the cut-off and rotated image to be used in further calibration. For each point, the feature vector is constructed using one of the polynomial regression methods:

(1)

(2)

(3)

(4)

(5)

, (6)

where *R, G,* and *B* are the values of color components and *y* =  is the vector of components from the color scale specification.

The values of RGB components for the feature vectors in this case is transferred from a standard RGB space to a linear RGB space by the following transformations:

The estimates of transformation coefficients are selected by solving the following system of equations:

The resulting coefficients are then used to transform the color components of the pixels of the overall image.

To assess the differences between the color components of the initial and corrected images, we used a parameter, *D*col, calculated as

Correspondingly, the feature vectors constructed analogously to *x,* rather than just colors, are used as and the resulting matrix is square. The closer the corrected color values to the initial ones, the closer is to unit matrix and, correspondingly, the closer is *D*col to zero.

2. Calculated Model Parameters

**Table S1.** Parameters determined by the application for recognizing spike shape.

| **Parameter** | **Measurement unit** | **Description** |
| --- | --- | --- |
| *L* | mm | Length of the broken line along the spike axial line |
| *P* | mm | Perimeter of spike contour without awns |
| *E*a | mm2 | Area of spike contour without awns |
| *A*a | mm2 | Total awn area |
| *E*a/*L*2 | – | Ratio of spike area to its squared length |
| *C* | – | Circularity index, the ratio of the perimeter of the circle with the area equal to the area of spike contour to perimeter of the contour; this index shows the degree to which the contour shape is close to a circle and ranges from 0 to 1 |
| *R* | – | Roundness, the ratio of spike contour area to the area of the circle with a diameter equal to the rotation axis of the contour (major axis) |
| *R*g | – | Rugosity index, the ratio of contour perimeter to convex perimeter |
| *S* | – | Solidity index, the ratio of contour area to the area of its convex hull |
| *x*u1 | mm | Distance from the spike tip to projection *B*’ of top *B* onto base *AD* |
| *x*u2 | mm | Distance from *B’* to projection *C’* of top *C* onto base *AD* |
| *y*u1 | mm | Distance from top *B* to its projection *B’* onto base *AD* |
| *y*u2 | mm | Distance from top *C* to its projection *C’* onto base *AD* |
| *α*u1 | Degrees | Inclination of edge *AB* relative to the base of the upper quadrilateral |
| *α*u2 | Degrees | Inclination of edge *BC* |
| *α*u3 | Degrees | Inclination of edge *CD* relative to the base of the upper quadrilateral |
| *t*u1 | – | Tangent of angle αu1 |
| *t*u2 | – | Tangent of angle αu2 |
| *t*u3 | – | Tangent of angle αu3 |
| *S*u1 | mm2 | Area of triangle *ABB’* |
| *S*u2 | mm2 | Area of trapezium *BB’C’C* |
| *S*u3 | mm2 | Area of triangle *DCC’* |
| *S*u | mm2 | Area of upper quadrilateral |
| *y*um | mm | Mean height of the upper quadrilateral |
| *AIx*2 | mm | Asymmetry index for the lengths of segments |
| *AIy*2 | mm | Asymmetry index for the heights of segments |
| *AIxy*2 | mm | Total asymmetry index |
| Sections of spike contour  (20 + 20 sections) | mm | Lengths of contour sections from the spike axial line: profile_1, profile_2, profile_3, …, profile_40 |
| Radial spike model (360 length of intervals) | mm | Intervals from the center of mass to the nearest point of contour in 360 directions with a step of 1 degree starting from the major axis of the contour: radial_1, radial_2, radial_3, …, radial_360 |

Table S1 lists the parameters of the quadrilateral model only for the upper quadrilateral. The parameters for the lower quadrilateral correspond to those of the upper one: *x*b1, *x*b2, *y*b1, *y*b2, *a*b1, *a*b2, *a*b3, *t*b1, *t*b2, *t*b3, *S*b1, *S*b2, *S*b3, *S*b, and *y*bm.

3. Illustration

**Figure S1.** Ratio of the total pixels of awns to the total awn area (mm2) grouped according to imaging scale. The values of linear regression are α = 0.00526 for scale 1, α = 0.00277 for scale 2, α = 0.00213 for scale 3, and α = 0.00146 for scale 4.


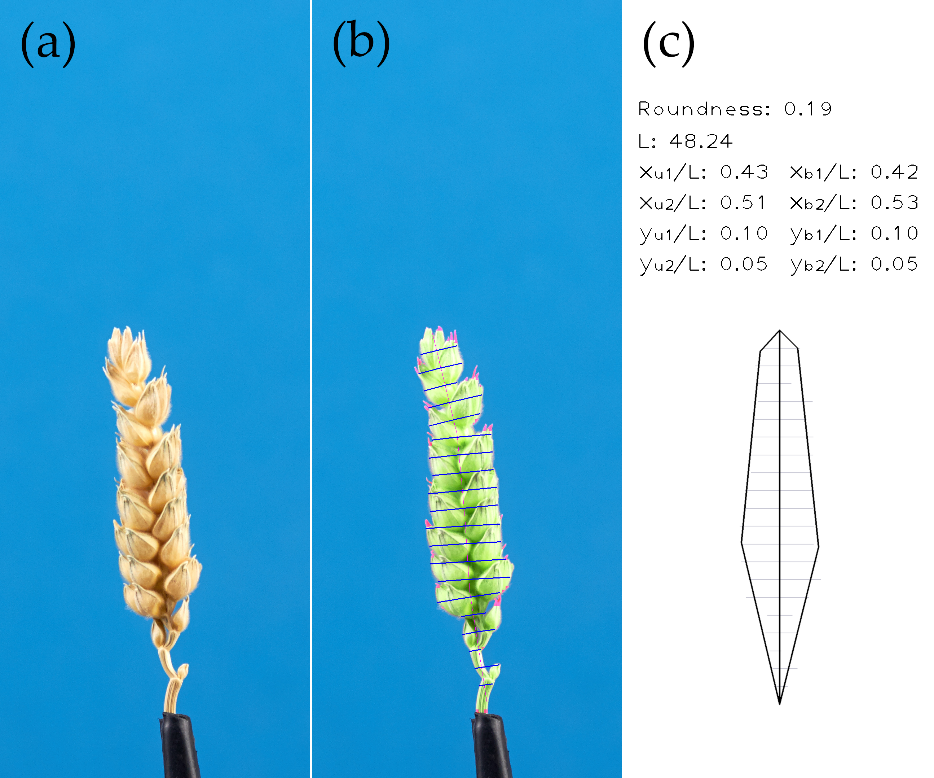


**Figure S2.** Stages of algorithm operation for compact spike type: (**a**) initial spike image; (**b**) the recognized spike body is highlighted with green; awn regions, with red; and sections, with blue; spike axis is denoted with red; and (**c**) Model of two adjacent quadrilaterals constructed based on extracted parameters.


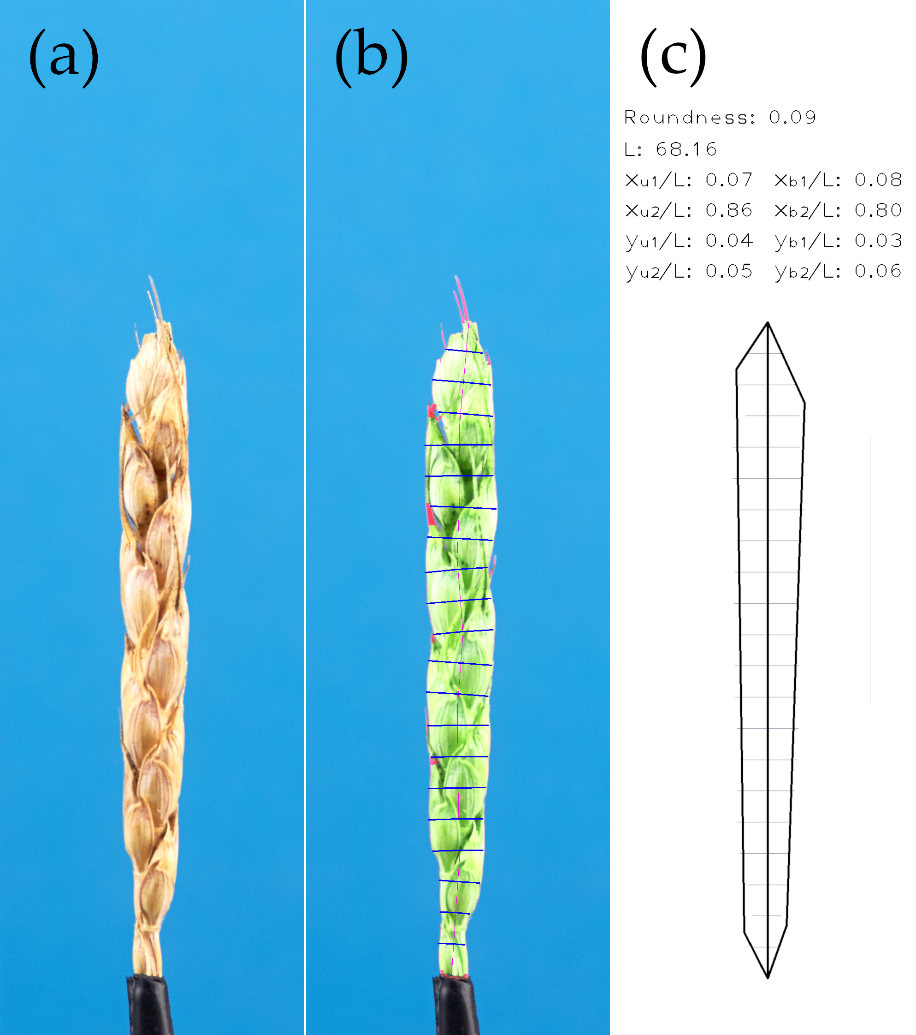


**Figure S3.** Stages of algorithm operation for normal spike types: (**a**) initial spike image; (**b**) the recognized spike body is highlighted with green; awn regions, with red; and sections, with blue; spike axis is denoted with red; and (**c**) Model of two adjacent quadrilaterals constructed based on extracted parameters.


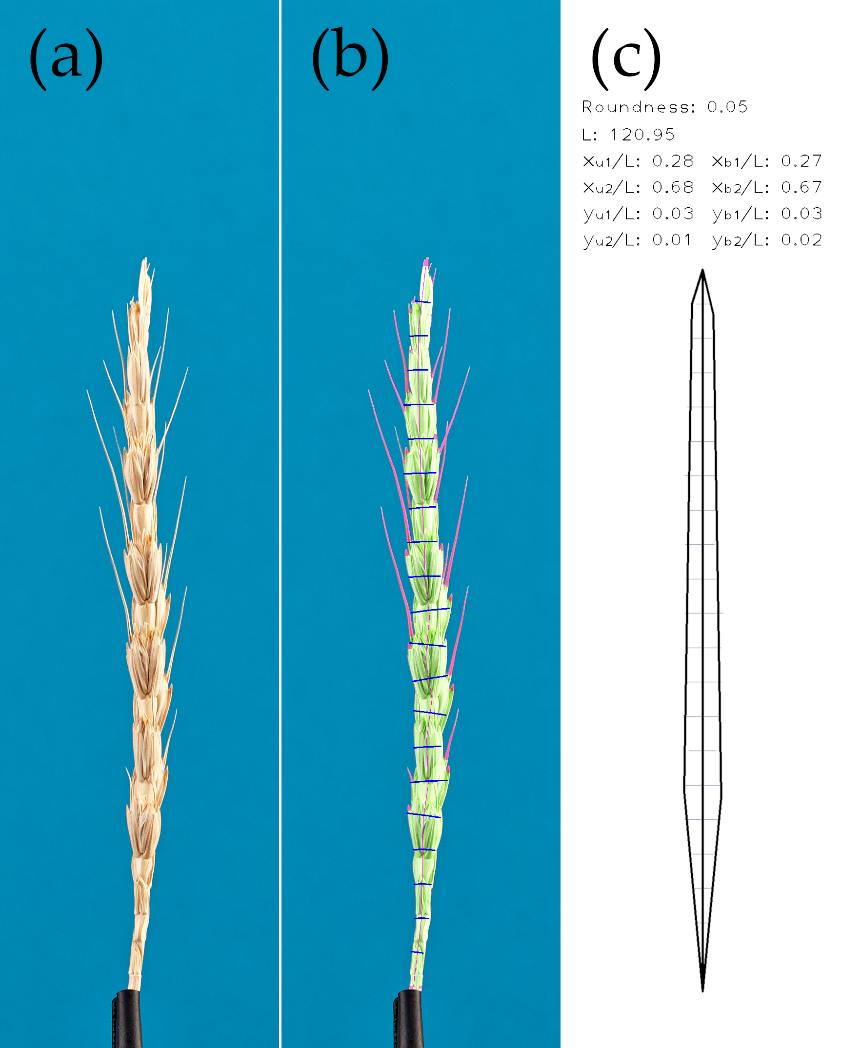


**Figure S4.** Stages of algorithm operation for spelt spike types: (**a**) initial spike image; (**b**) the recognized spike body is highlighted with green; awn regions, with red; and sections, with blue; spike axis is denoted with red; and (**c**) Model of two adjacent quadrilaterals constructed based on extracted parameters.


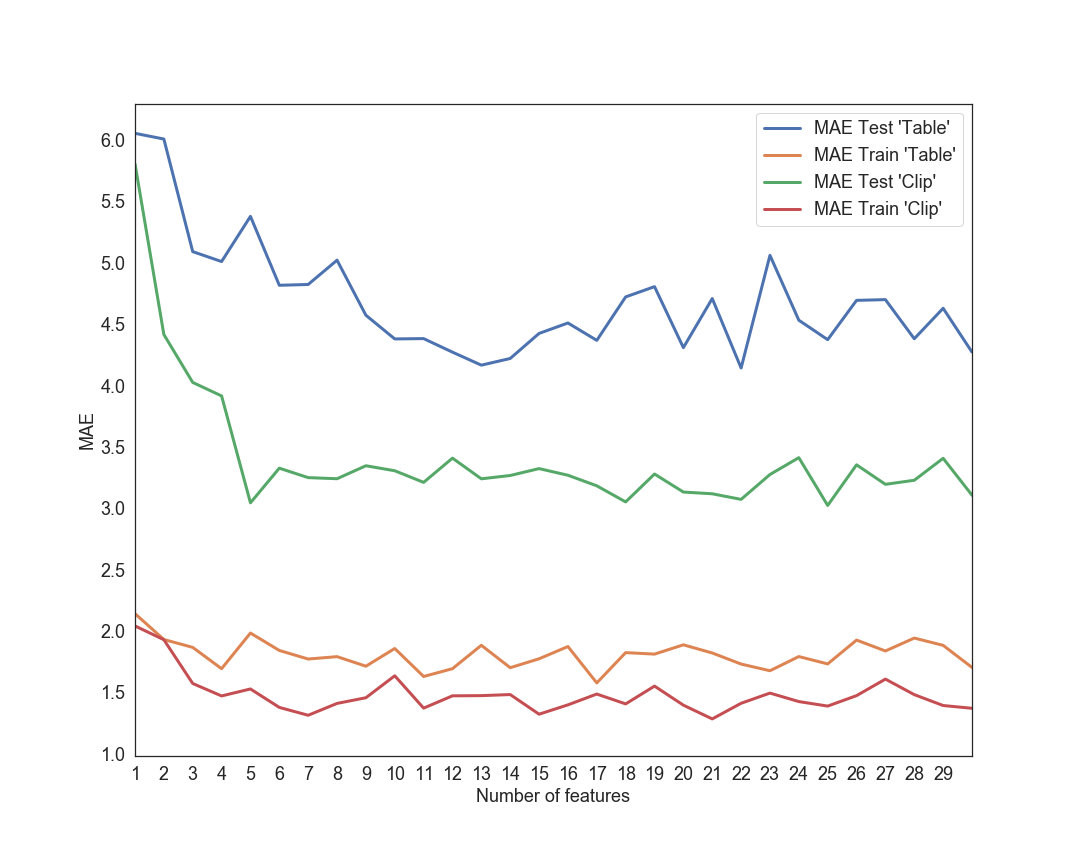


**Figure S5**. Dependence of the mean absolute error (MAE) in predicting spike density index on the number of best parameters used for training with random forest method.


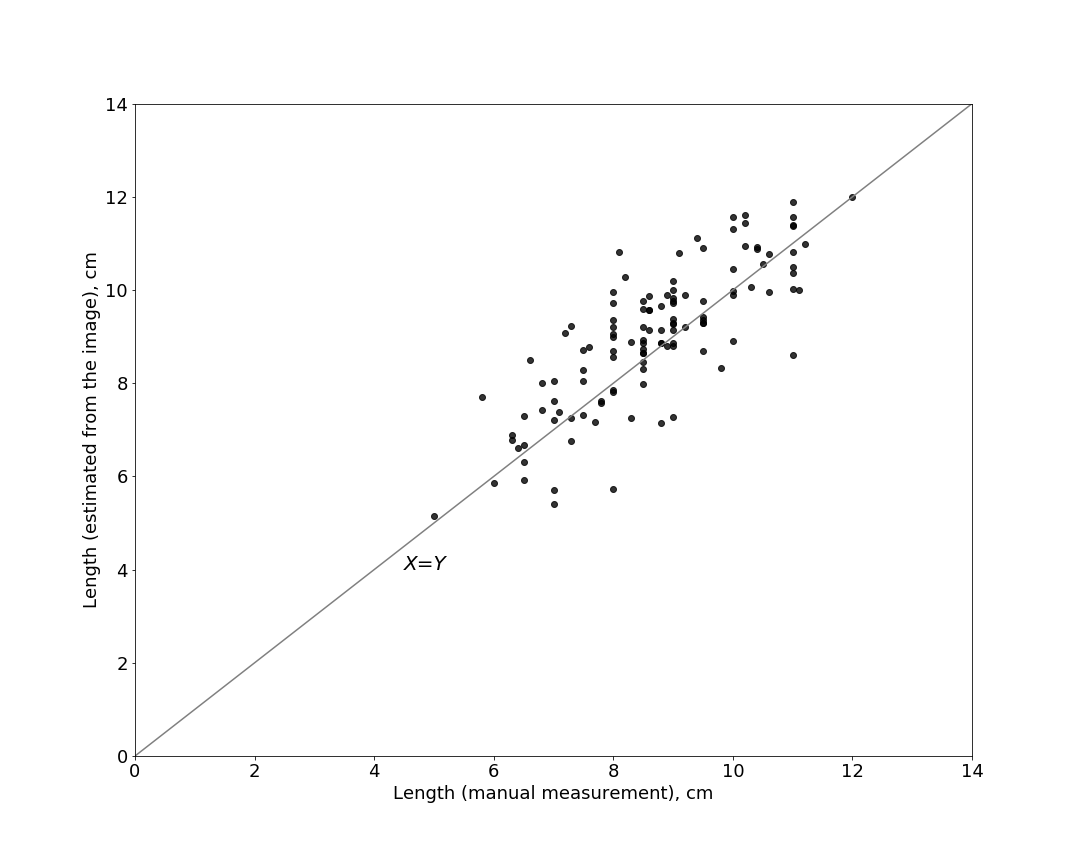


**Figure S6**. Scatterplot diagram for the main spike length for Triple Dirk B × KU506 F2 hybrid plants estimated manually (X axis) and from the 2D image analysis (Y axis). The solid line is Y=X line.

References

1. Kaehler, A.; Bradski, G. Learning OpenCV 3: computer vision in C++ with the OpenCV library. *O'Reilly Media, Inc.* **2016**.
2. Quintana, J.; Garcia, R.; Neumann, L.A novel method for color correction in epiluminescence microscopy. *Comput. Med. Imag. Grap.* **2011**, 35 (7-8), 646-652 [[CrossRef](https://dx.doi.org/10.1016/j.compmedimag.2011.03.006)] [[PubMed](https://www.ncbi.nlm.nih.gov/pubmed/21531539)].
